# Supplementary material for: Molecular Characterization of a Novel Geranylgeranyl Pyrophosphate Synthase from Plasmodium Parasites
Source: PubMed Central journal article supplement — J Biol Chem. 2010 Nov 17;286(5):3315–22. doi: 10.1074/jbc.M109.027235 (PMC3030337; doi:10.1074/jbc.m109.027235), 2010-11-17
Supplement: supp_M109.027235_FigS1.pdf [file supp_M109.027235_FigS1.pdf]

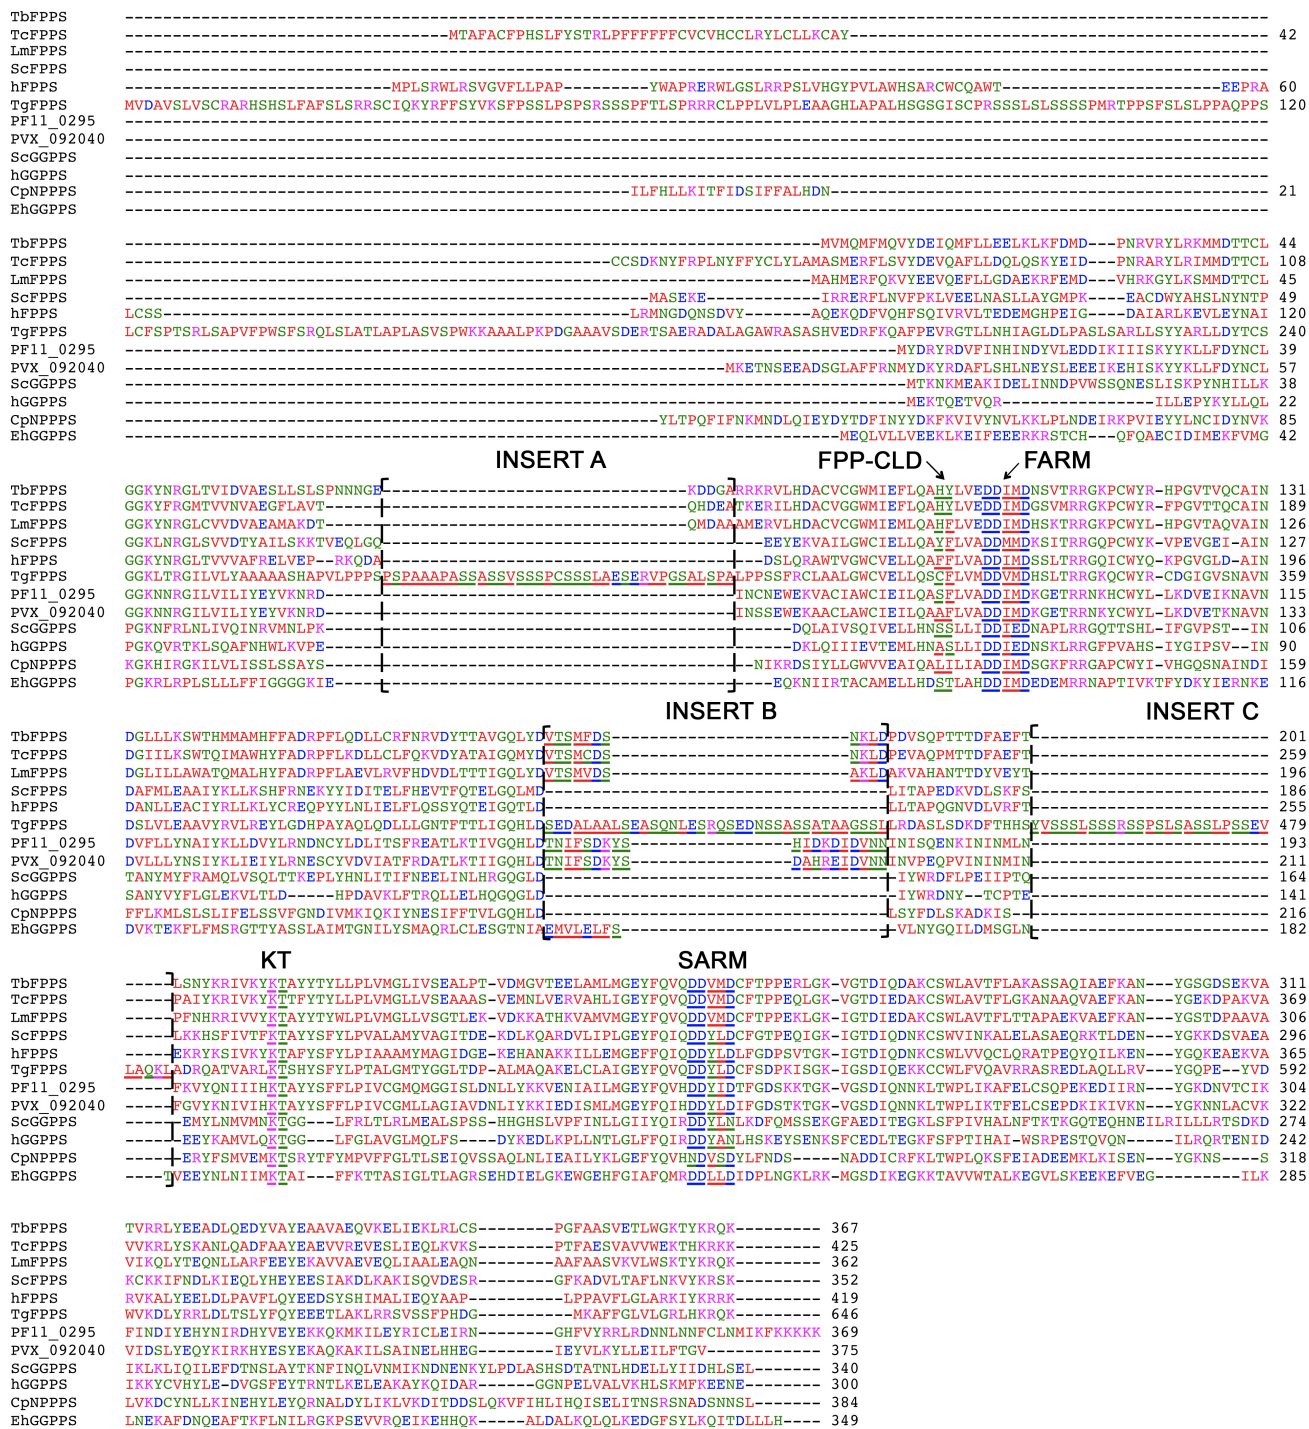

**Fig. S1 Sequence alignment of FPPS and GGPPS from various organisms.** In all *Plasmodium* species, there is only one protein homologous to human FPPS and GGPPS (PF11\_0295 in *P. falciparum* and PVX\_092040 in *P. vivax*).
