# Supplementary figures and images for: Molecular Characterization of a Novel Geranylgeranyl Pyrophosphate Synthase from Plasmodium Parasites
Source: PubMed Central journal article supplement — J Biol Chem. 2010 Nov 17;286(5):3315–22. doi: 10.1074/jbc.M109.027235 (PMC3030337; doi:10.1074/jbc.m109.027235), 2010-11-17

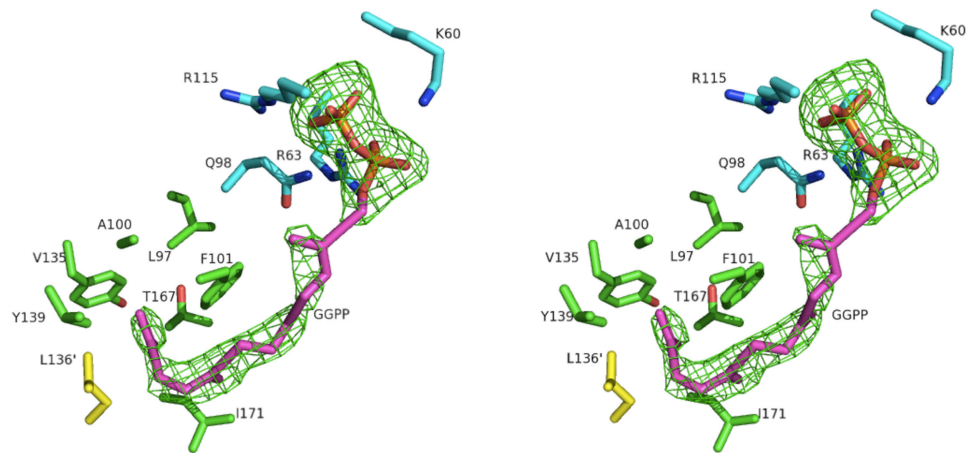

**Fig. S2 Stereo figure of key residues interacting with GGPP.**

Supplement: supp_M109.027235_FigS2.pdf [file supp_M109.027235_FigS2.pdf]

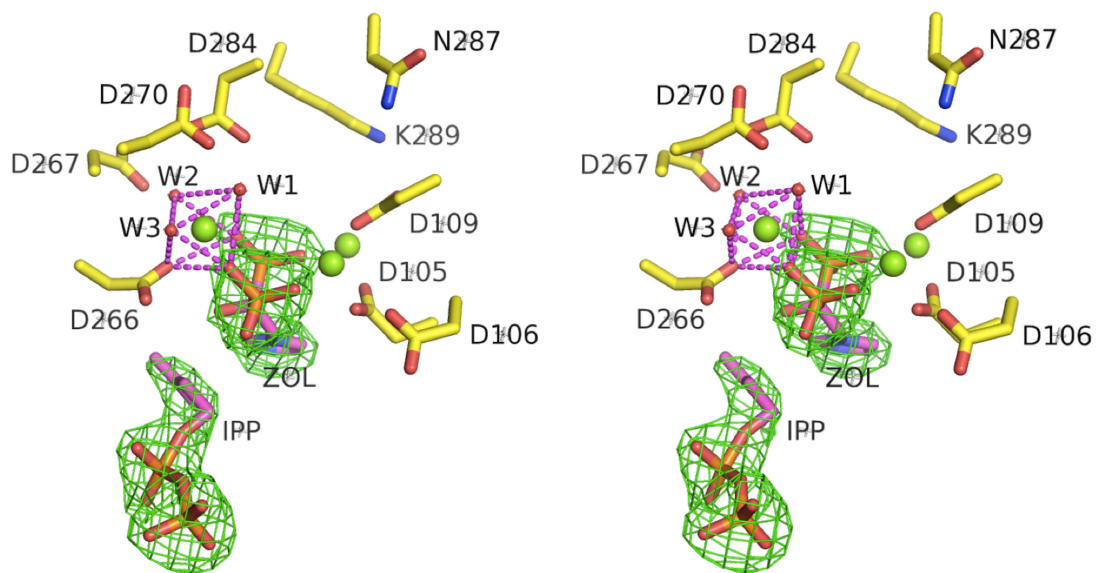

**Fig. S3 Stereo figure of key residues interacting with ZOL and IPP.**

Supplement: supp_M109.027235_FigS3.pdf [file supp_M109.027235_FigS3.pdf]
